# Supplementary material for: Exploiting heterogeneous features to improve in silico prediction of peptide status – amyloidogenic or non-amyloidogenic
Source: PubMed Central journal article supplement (PMC3278838; doi:10.1186/1471-2105-12-s13-s21), 2011-11-30
Supplement: 1471-2105-12-S13-S21-S2.pdf [file 1471-2105-12-S13-S21-S2.pdf]

**Additional file 2 – AAindex Ids or Accession Nos. of 40 BPC properties used.**

This file shows the BPC properties selected by Memetic Algorithm.

|                                                                      |                                                                                                           |
|----------------------------------------------------------------------|-----------------------------------------------------------------------------------------------------------|
| AGGR000246 (Aggregation Potential)                                   | KUHL950101 (Hydrophilicity scale)                                                                         |
| BHAR880101 (Average flexibility indices)                             | LEVM780102 (Normalized frequency of beta-sheet, with weights)                                             |
| BULH740101 (Transfer free energy to surface)                         | MEIH800101 (Average reduced distance for C-alpha)                                                         |
| BURI000230 (Molar fraction (%) of 2001 buried residues)              | MEIH800102 (Average reduced distance for side chain)                                                      |
| CHAM810101 (Steric parameter)                                        | MIYS850101 (Effective partition energy)                                                                   |
| CHOC760102 (Residue accessible surface area in folded protein)       | MONM990201 (Averaged turn propensities in a transmembrane helix)                                          |
| CHOP780203 (Normalized frequency of beta-turn)                       | NADH010101 (Hydropathy scale based on self-information values in the two-state model (5% accessibility))  |
| CHOP780211 (Normalized frequency of C-terminal non beta region)      | NADH010103 (Hydropathy scale based on self-information values in the two-state model (16% accessibility)) |
| CIDH920105 (Normalized average hydrophobicity scales)                | NAGK730101 (Normalized frequency of alpha-helix)                                                          |
| DESM900101 (Membrane preference for cytochrome b: MPH89)             | NAKH900110 (Normalized composition of membrane proteins)                                                  |
| ENGD860101 (Hydrophobicity index)                                    | NAKH920105 (AA composition of MEM of single-spanning proteins)                                            |
| FAUJ830101 (Hydrophobic parameter pi)                                | NAKH920108 (AA composition of MEM of multi-spanning proteins)                                             |
| FUKS010108 (Interior composition of amino acids in nuclear proteins) | PONP800101 (Surrounding hydrophobicity in folded form)                                                    |

|                                                                      |                                                                                                               |
|----------------------------------------------------------------------|---------------------------------------------------------------------------------------------------------------|
| GUYH850101 (Partition energy)                                        | PRAM900101 (Hydrophobicity)                                                                                   |
| GUYH850104 (Apparent partition energies calculated from Janin index) | PRAM900103 (Relative frequency in beta-sheet)                                                                 |
| NORM000219 (Normalized consensus hydrophobicity scale)               | PUNT030102 (Knowledge-based membrane-propensity scale from 3D_Helix in MPtopo databases)                      |
| JACR890101 (Weights from the IFH scale)                              | ROSG850102 (Mean fractional area loss)                                                                        |
| JANJ780103 (Percentage of exposed residues)                          | ROSM880102 (Side chain hydrophathy, corrected for solvation)                                                  |
| JANJ790101 (Ratio of buried and accessible molar fractions)          | VHEG790101 (Transfer free energy to lipophilic phase)                                                         |
| JANJ790102 (Transfer free energy)                                    | VINM940104 (Normalized flexibility parameters (B-values) for each residue surrounded by two rigid neighbours) |
